# Supplementary material
Source: Royal Society of Chemistry journal article supplement (doi:10.1039/d5ma01497b)
Supplement: d5ma01497b1.pdf [file d5ma01497b1.pdf]

## **Glycine-proline-hydroxyproline Modification Improves the Affinity of CEMP1 N-terminal 20-residue Peptide to Collagen**

Yuxiang Sun<sup>a,b,\*</sup>, Yanqian Zhao<sup>b</sup>, Li Xu<sup>b,\*</sup>, Weibin Sun<sup>a,\*</sup>

<sup>a</sup> Department of Periodontology, Nanjing Stomatological Hospital, Medical School of Nanjing University, Nanjing, 210000, P. R. China.

<sup>b</sup> Key laboratory of the Jiangsu Higher Education Institutions for Integrated Traditional Chinese and Western Medicine in Senile Diseases Control, School of Traditional Chinese Medicine, Faculty of Medicine, Yangzhou University, Yangzhou, 225009, PR China.

\* Corresponding author.

E-mail addresses: sunyuxiang@yzu.edu.cn (Y. Sun), xulibg@yzu.edu.cn (L. Xu), wbsun@nju.edu.cn (W. Sun).

## Supplementary information

Figure S1

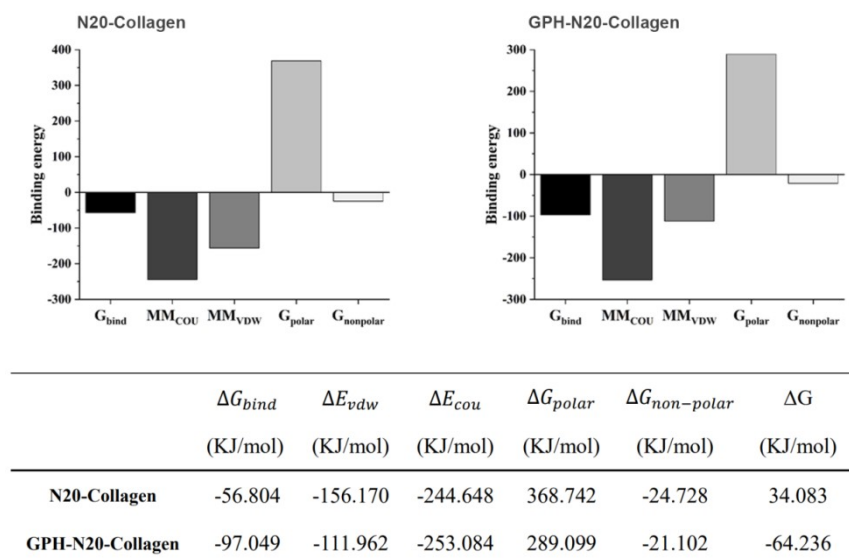

Fig S1. MM-PBSA results of N20-collagen and GPH-N20-collagen.

Figure S2

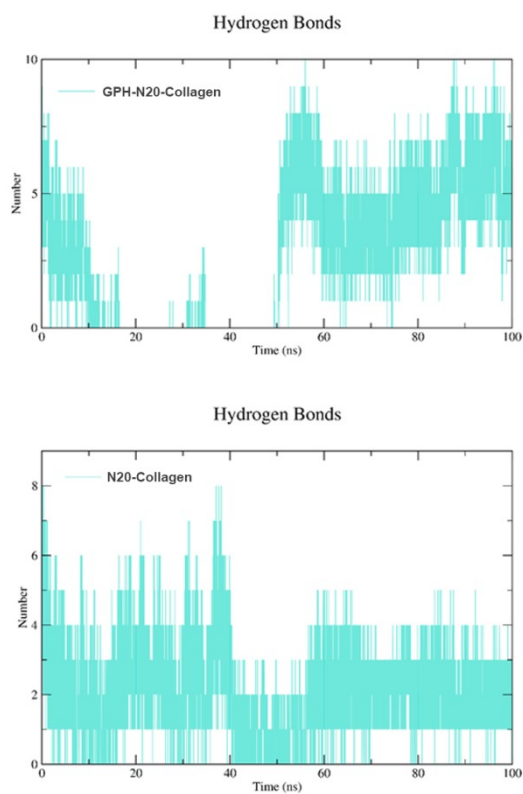

Fig S2. The number of hydrogen bonds in N20-collagen and GPH-N20-collagen.

**Figure S3**

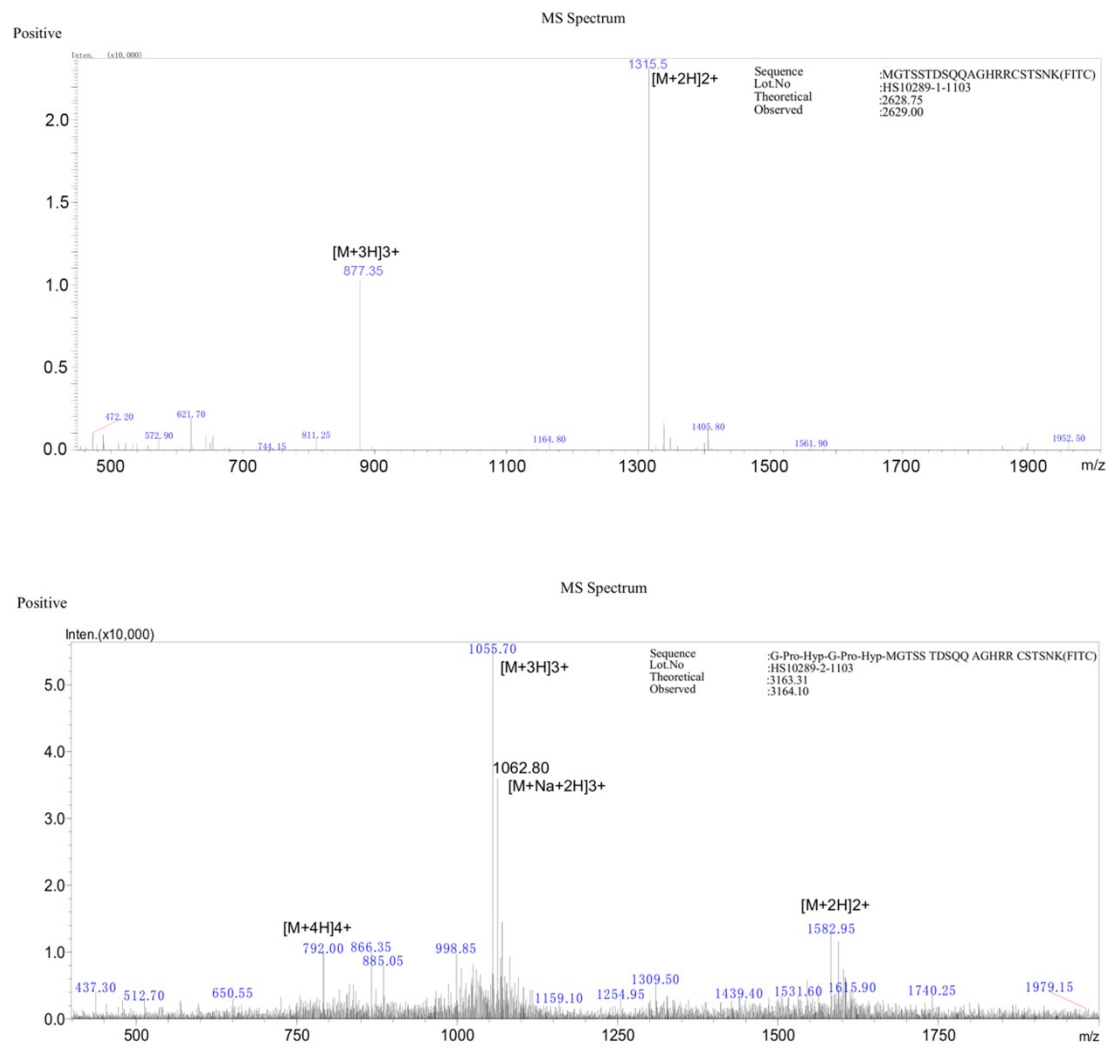

**Fig S3.** Amino acid composition sequences of N20 peptide and GPH-N20 peptide, as well as their mass spectra.

**Figure S4**

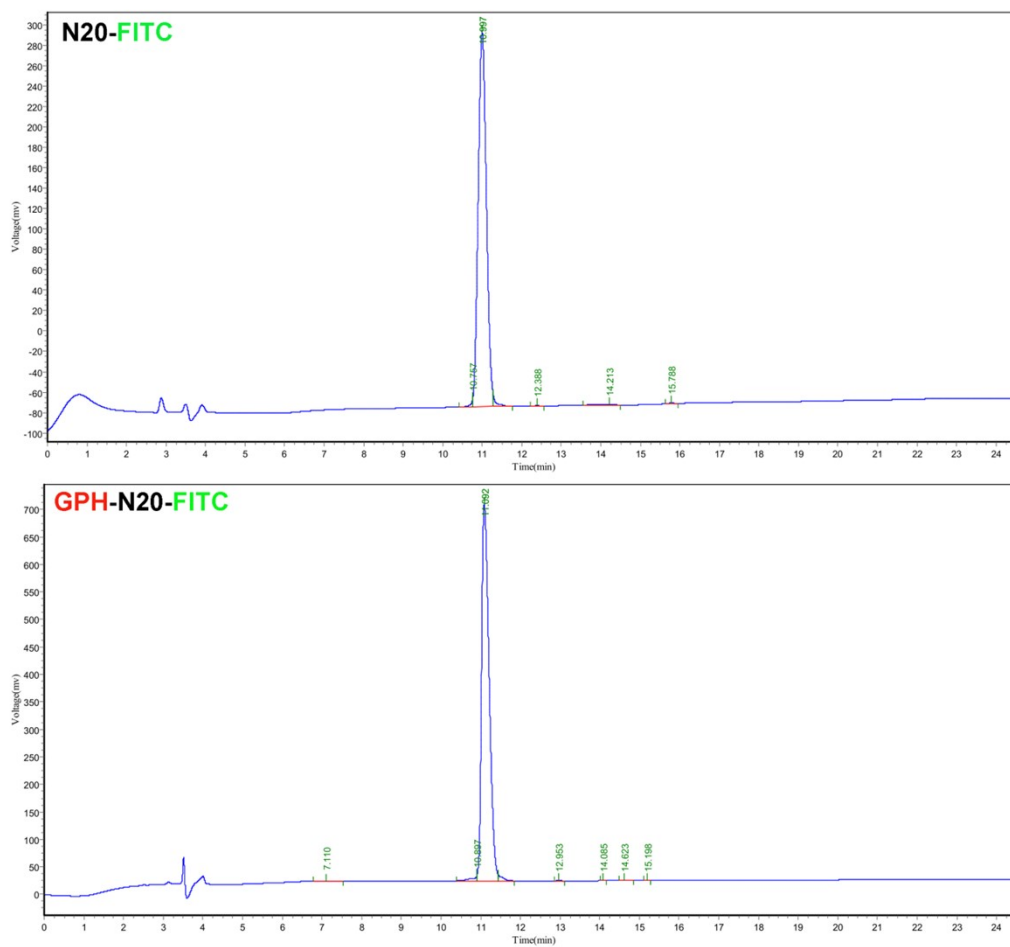

**Fig S4.** The purity of N20 peptide and GPH-N20 peptide was characterized by HPLC.

**Figure S5**

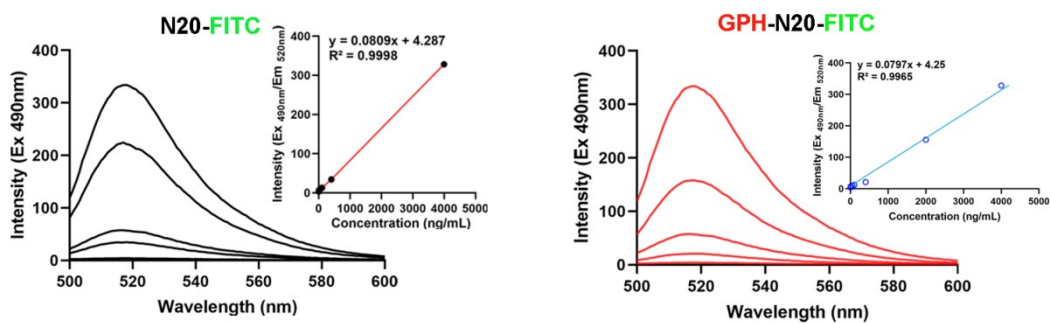

**Fig S5.** Emission spectra of two peptides generated by excitation light at 490 nm and the linear relationship between the maximum emission peak at 520 nm corresponding to different concentrations.

**Figure S6**

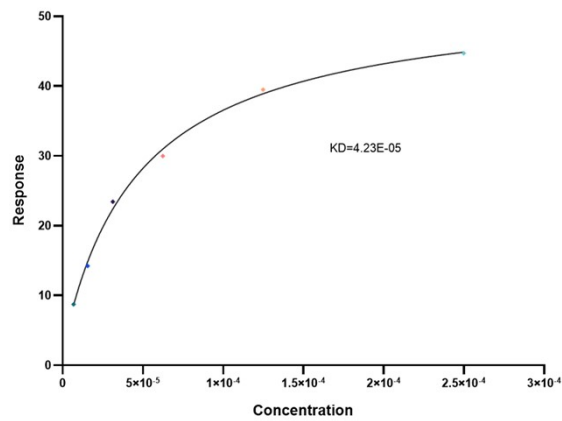

**Fig S6.** Type I collagen immobilized on CM5 chip can bind GPH-N20 with an affinity constant of 42  $\mu$ M as determined in a SPR assay, while pure N20 shows no affinity for type I collagen.

**Figure S7**

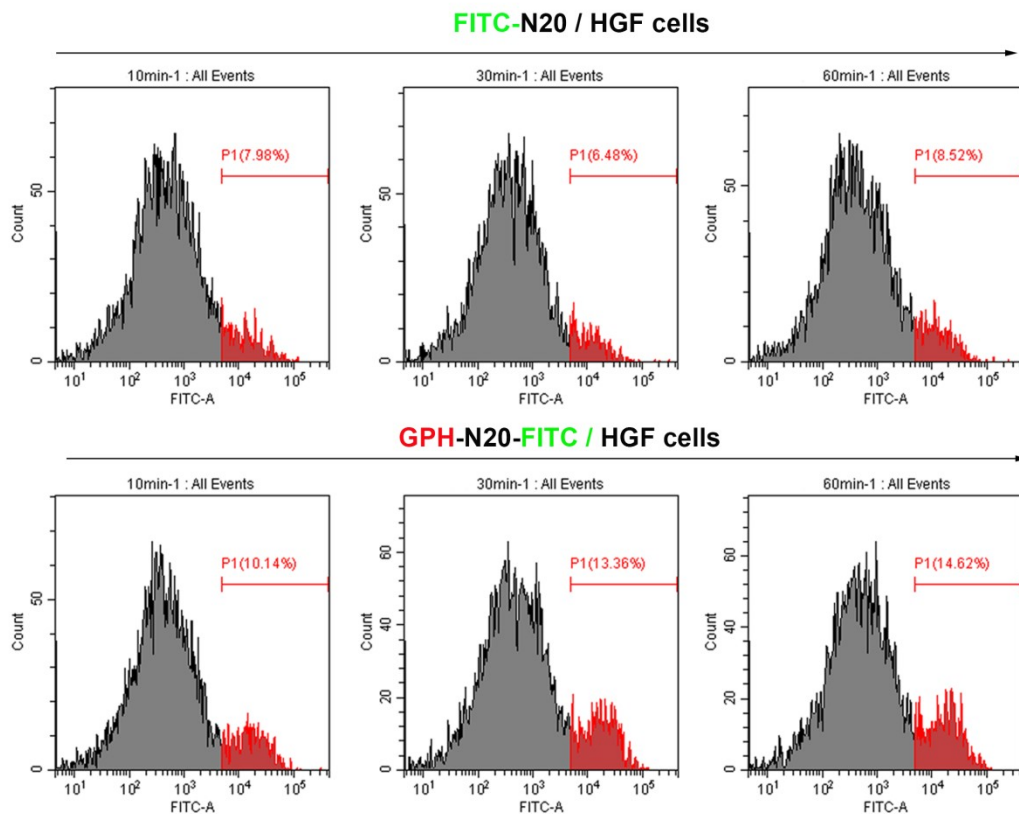

**Fig S7.** Cultivate HGF cells and co-incubate with 1  $\mu$ g/mL two peptides for 10, 30 and 60 min, respectively. After washing, detect the green fluorescence signals on the cell surface by flow cytometry (n=3).

**Figure S8**

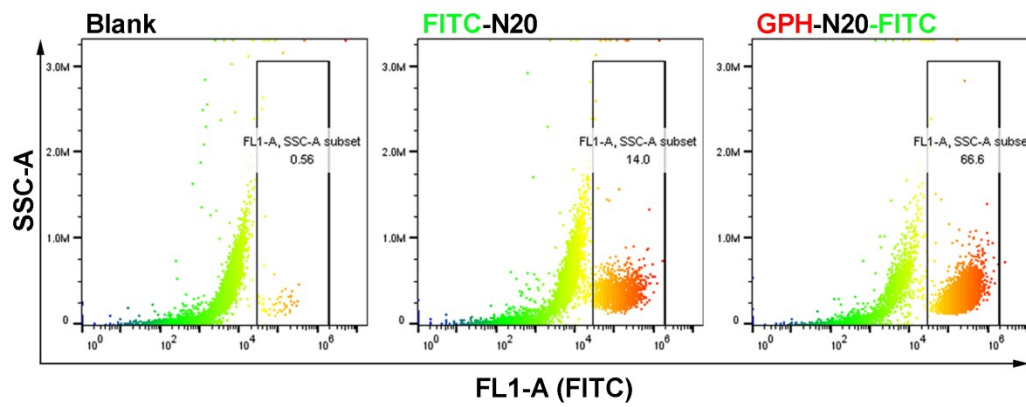

**Fig S8.** Cultivate HGF cells and co-incubate with 1  $\mu\text{g/mL}$  two peptides for 24h, respectively. After washing, detect the green fluorescence signals in HGFs by flow cytometry (n=4).
